# Supplementary material for: Wetland Vulnerability Metrics as a Rapid Indicator in Identifying Nature-Based Solutions to Mitigate Coastal Flooding
Source: MDPI journal article supplement (doi:10.3390/hydrology9120218), 2022-12-02

## Supplementary Materials

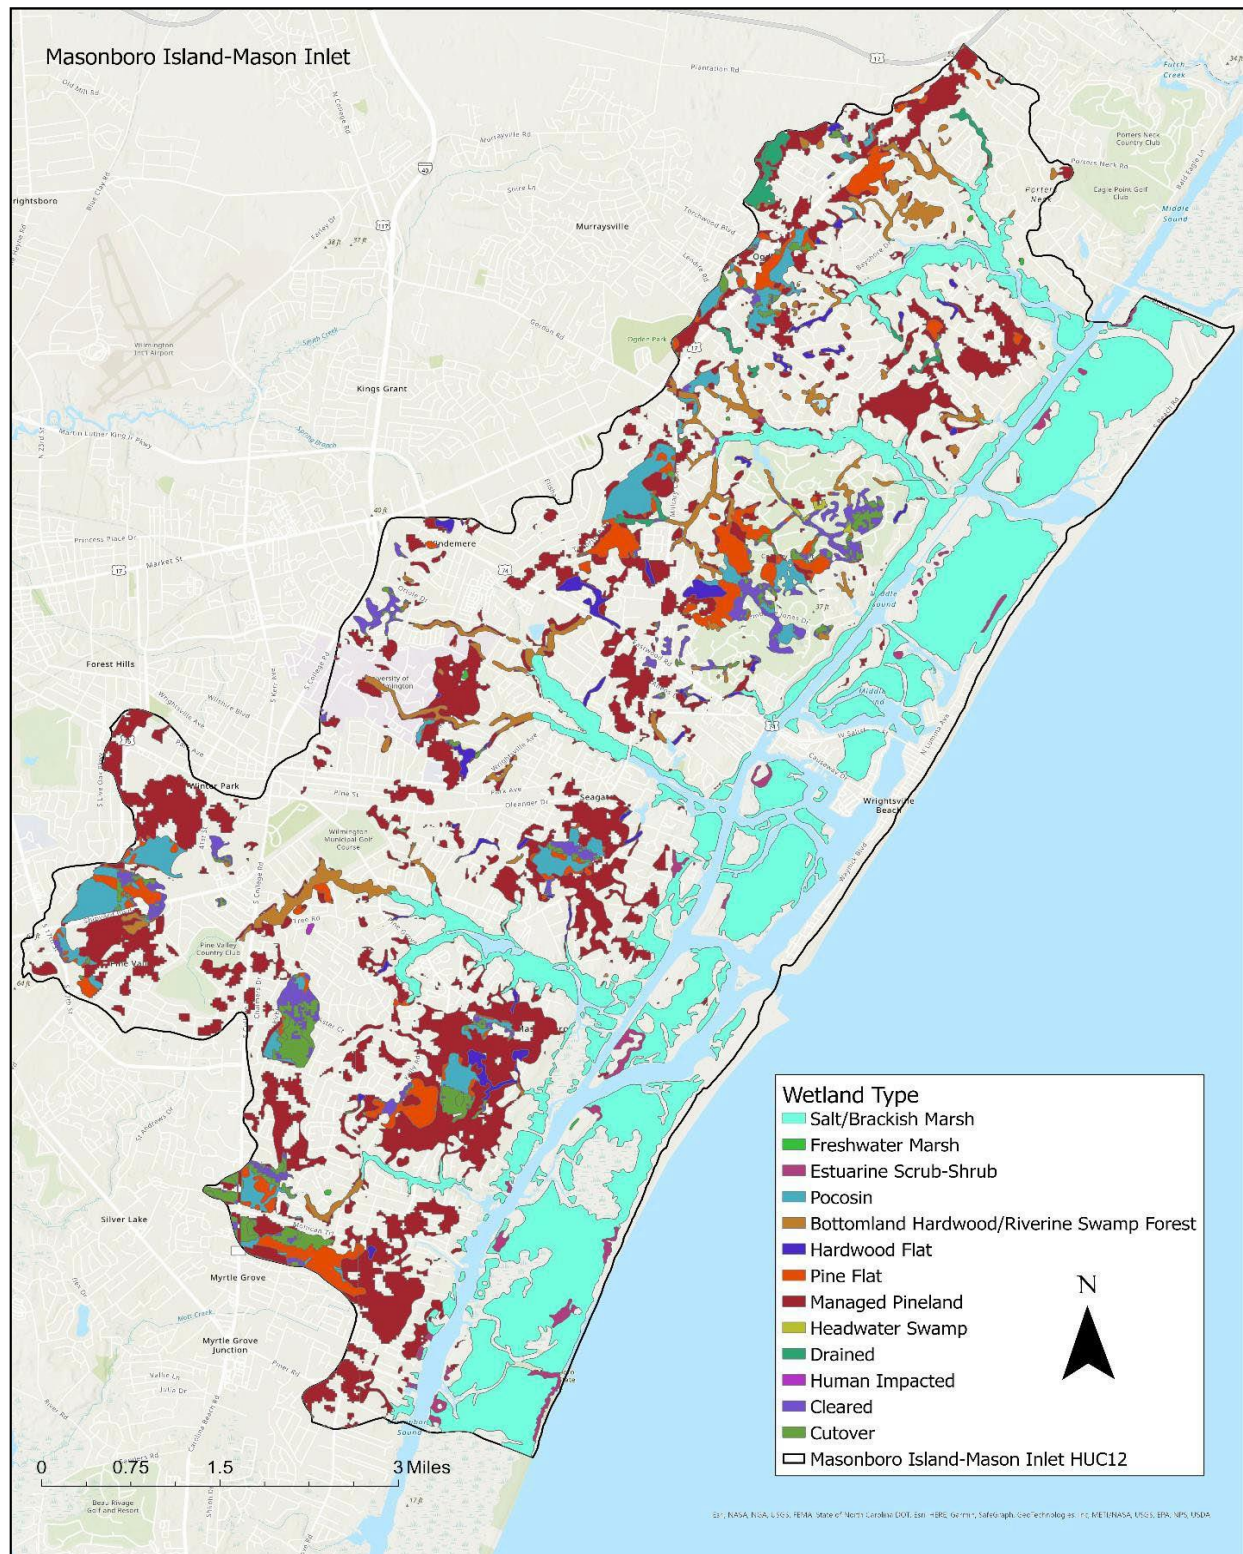



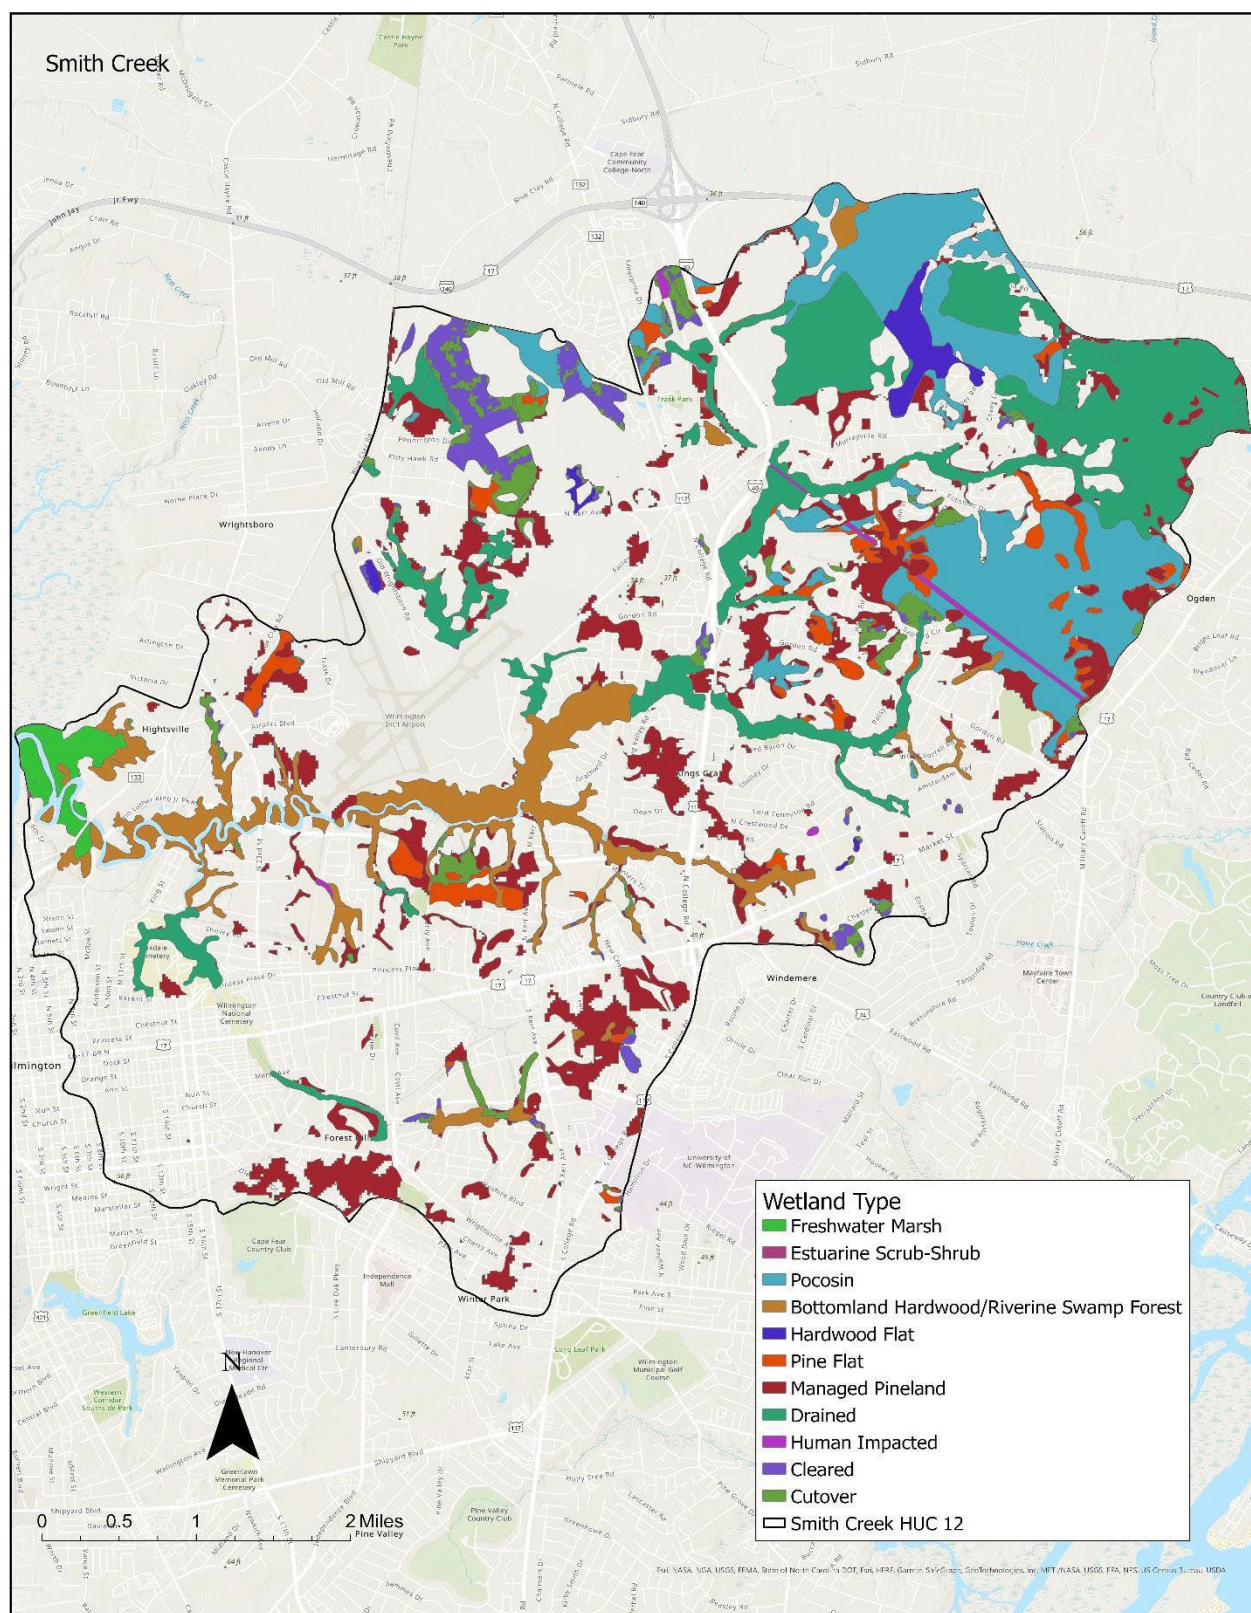

Figure S2. Wetland types of the Smith Creek subwatershed (21,136.41 acres) per NCDEQ wetland data (datasource: NCDEQ).



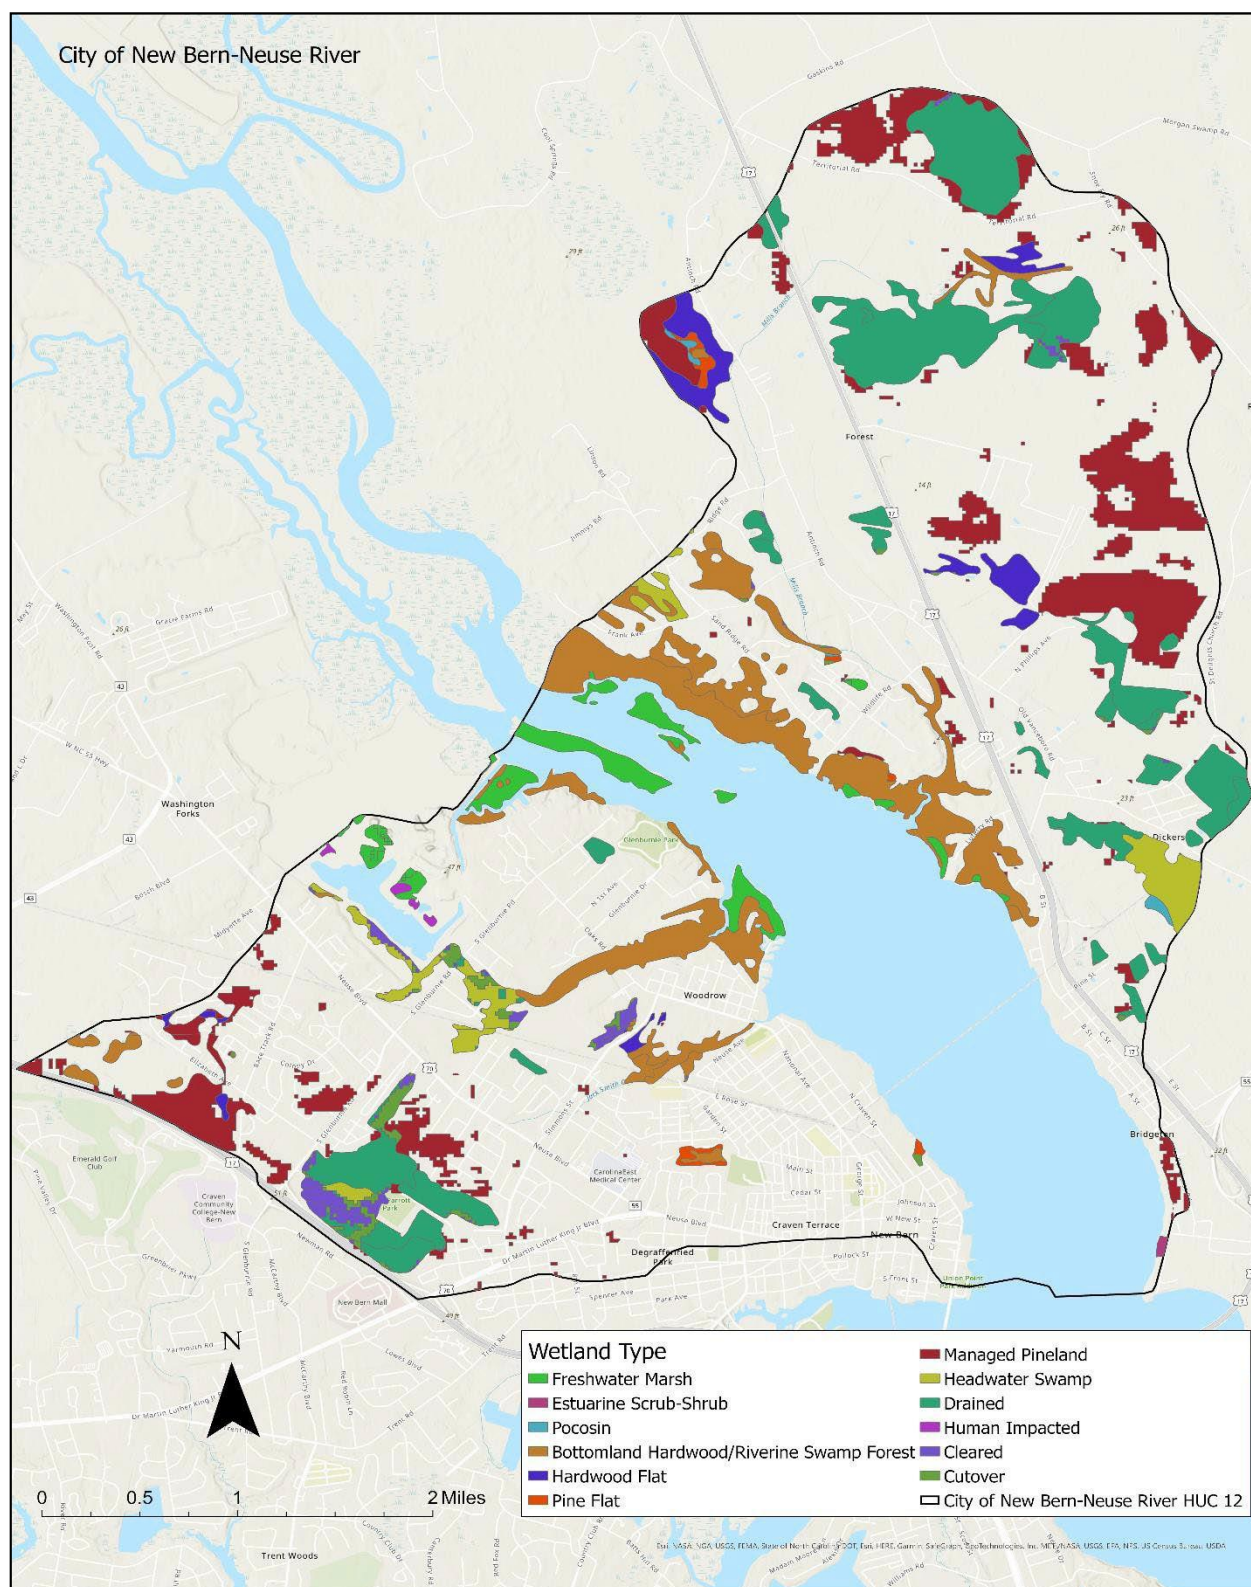



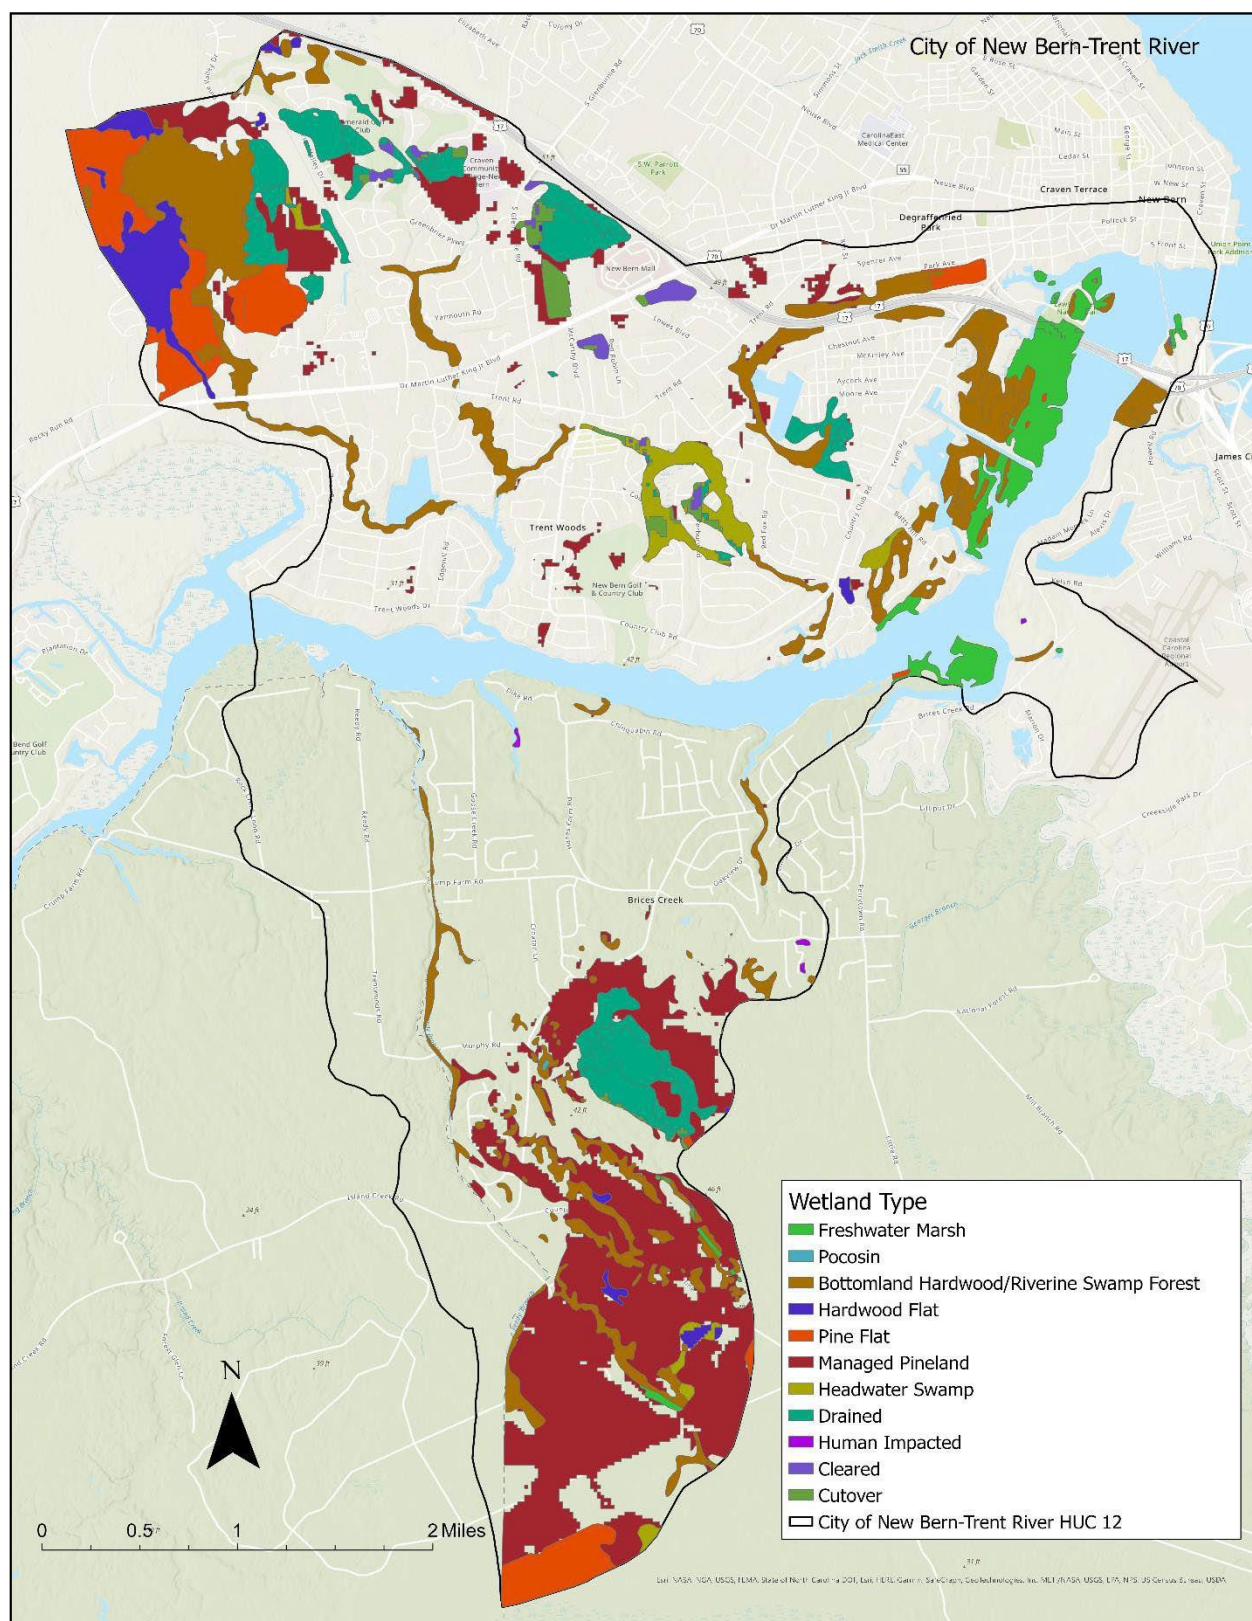

Table S1 *Dates of Landsat 8 data utilized for the sensitivity time series analysis*

| Landsat 8 date of collection | Spatial resolution | Path | Row | Tier |
|------------------------------|--------------------|------|-----|------|
| 4/24/2014                    | 30 meters          | 15   | 36  | T1   |
| 8/14/2014                    | 30 meters          | 15   | 36  | T1   |
| 4/27/2015                    | 30 meters          | 15   | 36  | T1   |
| 6/14/2015                    | 30 meters          | 15   | 36  | T1   |
| 5/15/2016                    | 30 meters          | 15   | 36  | T1   |
| 5/2/2017                     | 30 meters          | 15   | 36  | T1   |
| 7/21/2017                    | 30 meters          | 15   | 36  | T1   |
| 8/9/2018                     | 30 meters          | 15   | 36  | T1   |
| 4/22/2019                    | 30 meters          | 15   | 36  | T1   |
| 7/27/2019                    | 30 meters          | 15   | 36  | T1   |
| 4/8/2020                     | 30 meters          | 15   | 36  | T1   |
| 4/27/2021                    | 30 meters          | 15   | 36  | T1   |

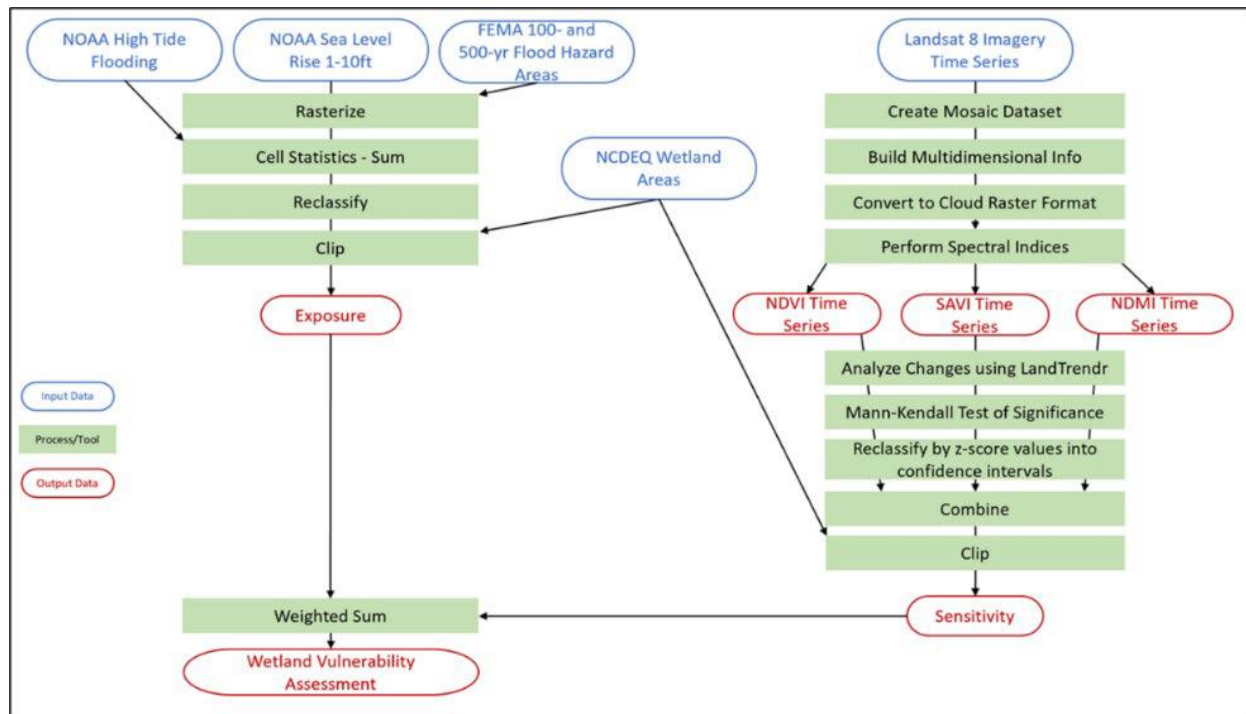

Figure S5. Detailed wetland vulnerability assessment workflow showing intermediary computational steps for ArcGIS Pro implementation.



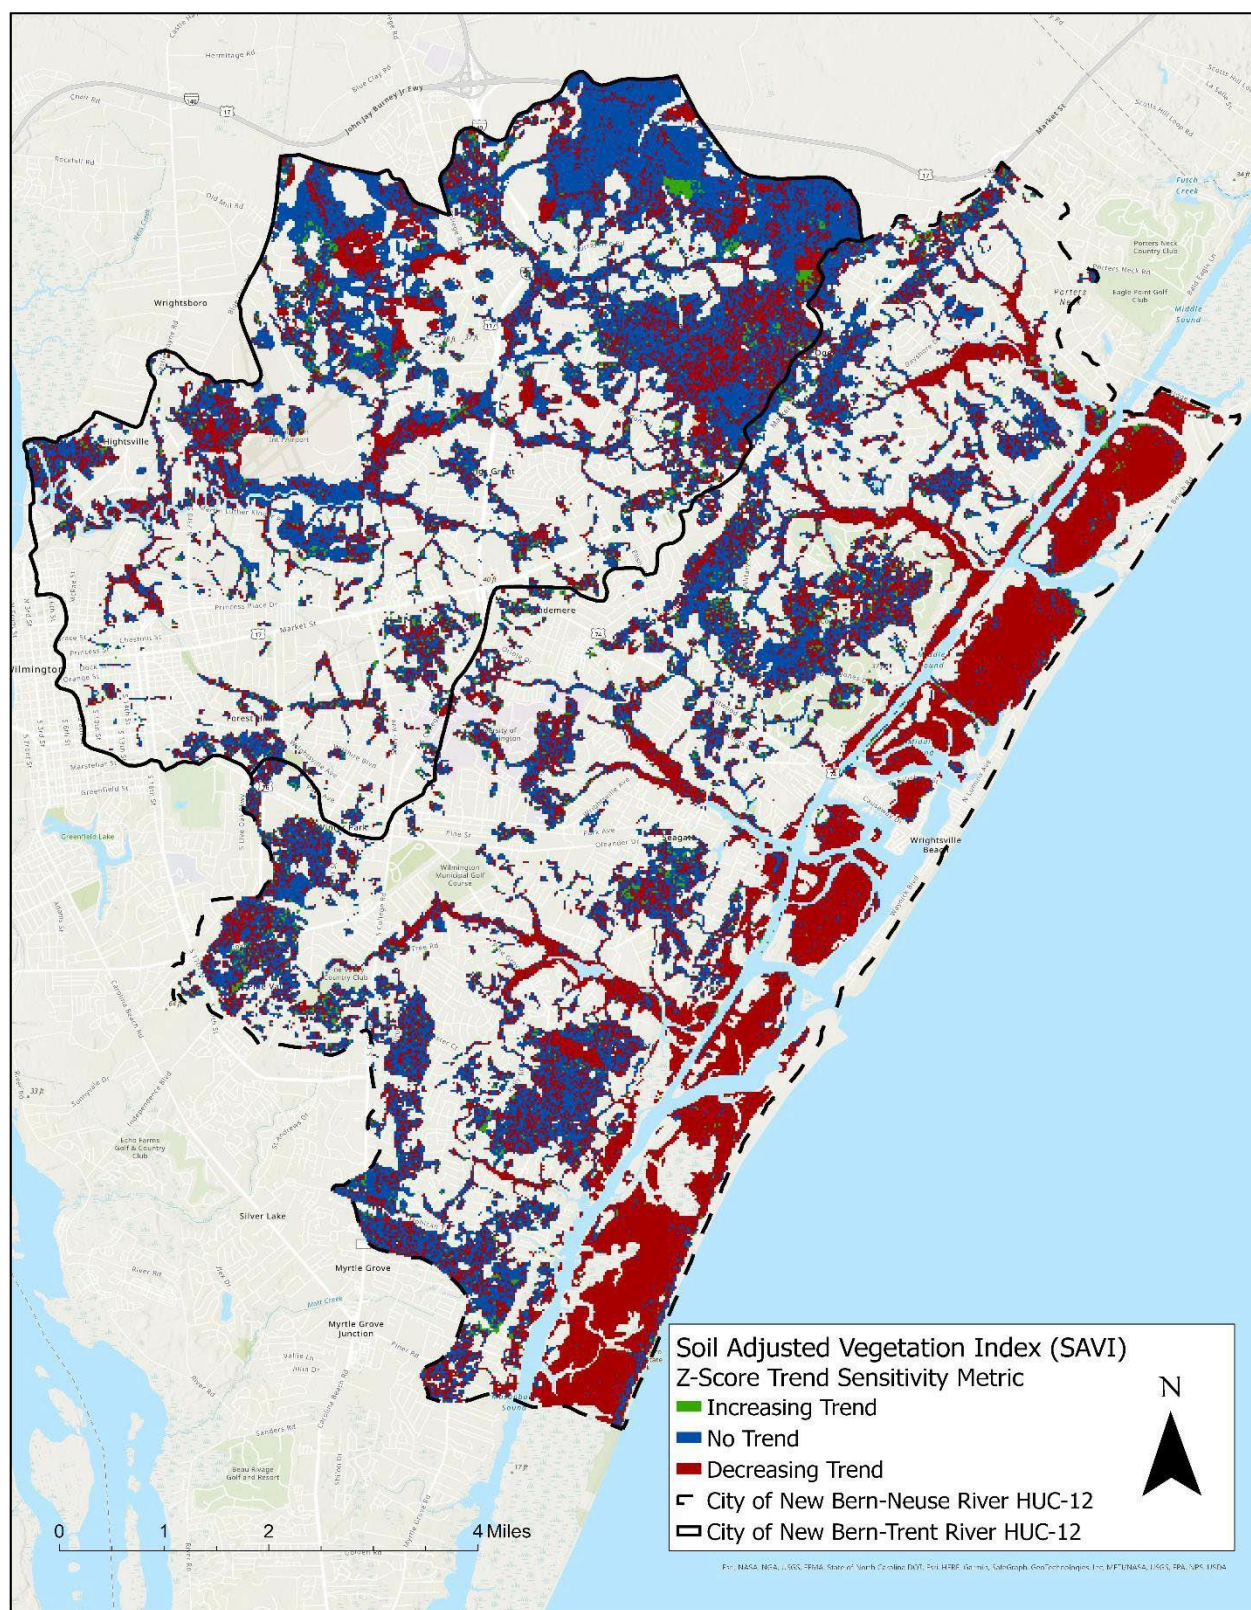



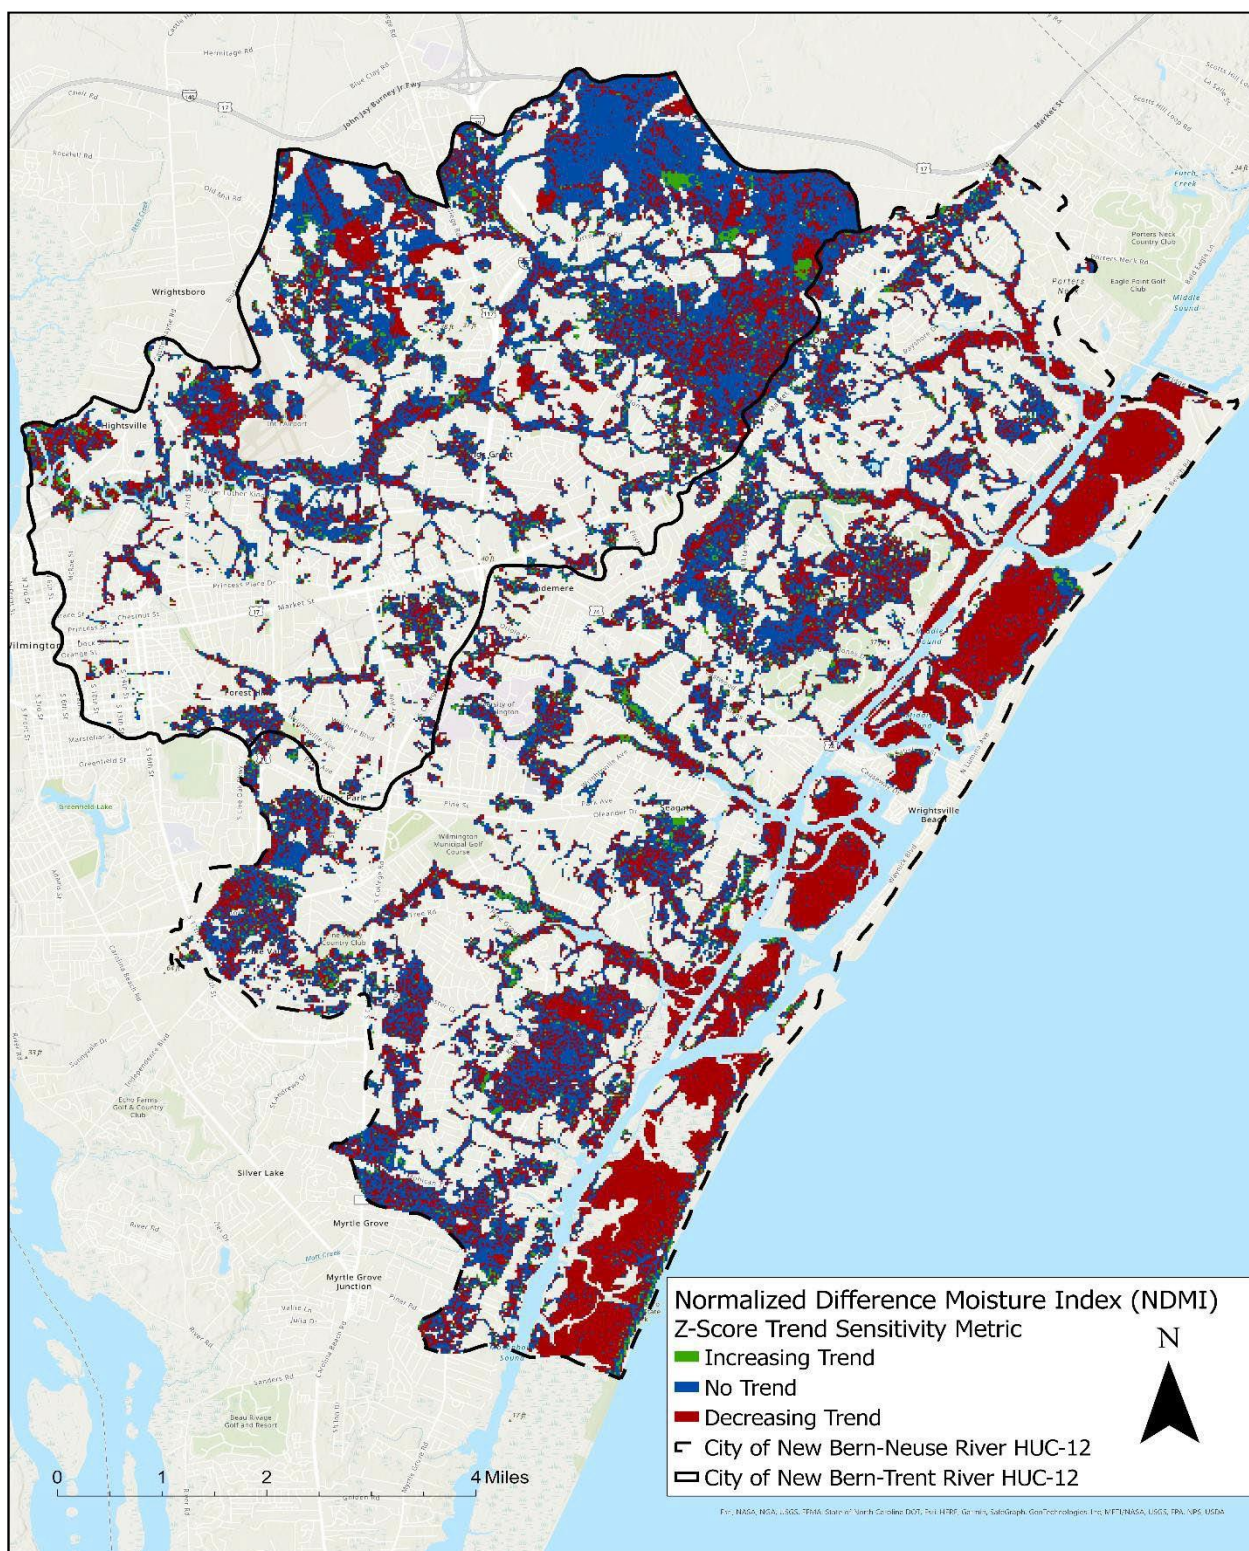

Supplement: s1 [file s1]
