# Supplementary material for: Wetland Vulnerability Metrics as a Rapid Indicator in Identifying Nature-Based Solutions to Mitigate Coastal Flooding
Source: MDPI journal article supplement (doi:10.3390/hydrology9120218), 2022-12-02
Supplement: s1 [file s1]

Archive with 1 entries (1 files):
- hydrology-2027021-supplementary.pdf
